# Supplementary material for: Discovery of Eicosapentaenoic Acid Esters of Hydroxy Fatty Acids as Potent Nrf2 Activators
Source: PubMed Central journal article supplement (PMC7278747; doi:10.3390/antiox9050397), 2020-05-08

## Supporting material for

### Discovery of Eicosapentaenoic Acid Esters of Hydroxy Fatty Acids as Potent Nrf2 activators

Siddabasave Gowda B. Gowda <sup>1</sup>, Hirotooshi Fuda <sup>1</sup>, Takayuki Tsukui <sup>2</sup>, Hitoshi Chiba <sup>2</sup>, and Shu-Ping Hui\*<sup>1</sup>

1. Faculty of Health Sciences, Hokkaido University, Kita-12, Nishi-5, Kita-Ku, Sapporo 060-0812, Japan
2. Department of Nutrition, Sapporo University of Health Sciences, Nakanuma Nishi-4-3-1-15, Higashi-Ku, Sapporo 007-0894, Japan.

#### Contents:

1. Figure S1: **S1**
2. Figure S2: **S2**
3. Figure S3: **S3**
4. <sup>1</sup>H and <sup>13</sup>C-NMR spectra of FAHFAs: **S4-S9**

**Figure S1:** Reporter gene (luciferase) assay results of oleic acid, linoleic acid esters of 12-HSA and 12-HOA and free fatty acids (EPA and 12-HSA)

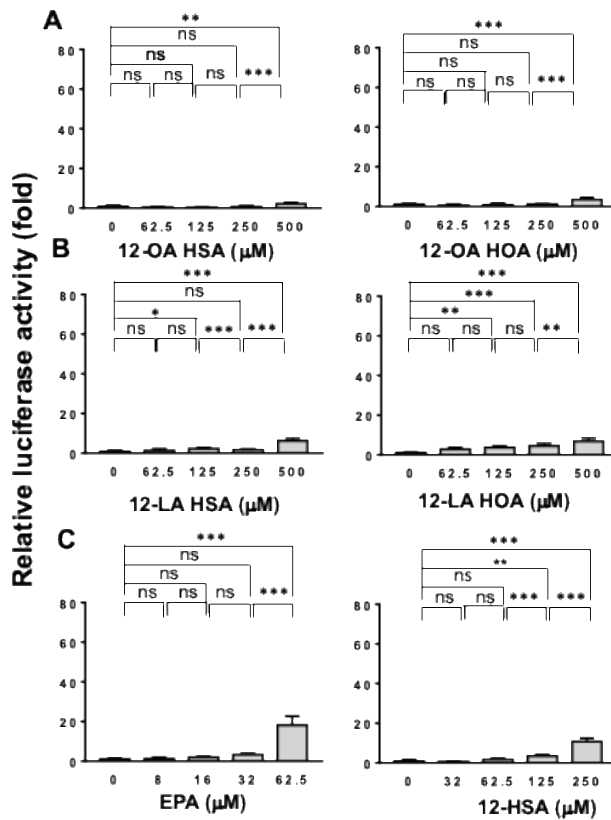

**Figure S2:** Relative expression of DDIT3 (CHOP) (NM001195053) in response to 12-EPAHSA treatment. \*\* $p < 0.01$ , (one-way ANOVA) (n=6).

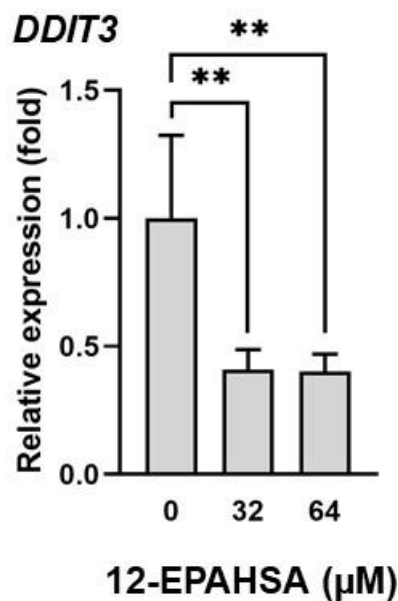

**Figure S3:** Relative intensity folds of oxidative stress induced by H<sub>2</sub>O<sub>2</sub> and effect of 12-EPAHSA treatment. \*\*\*p<0.001, (one-way ANOVA) (n=6 for control and n=4 for H<sub>2</sub>O<sub>2</sub>). The cellular oxidative stress due to H<sub>2</sub>O<sub>2</sub>-induced ROS was measured by the dichlorofluorescein-diacetate (DCFH-DA) assay with the protocol established in our laboratory [17-18]. A condition of cellular stress in HepG2 cells is evoked by treating 0.25 mM H<sub>2</sub>O<sub>2</sub> for 30 min, and fluorescence intensity was read at 485 (excitation) and 525 (emission) nm using Wallac 1420 ARVO Mx plate reader (PerkinElmer, Japan).

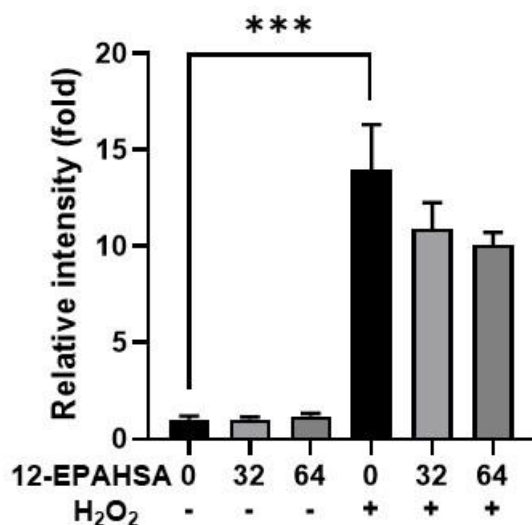

### 3. $^1\text{H}$ and $^{13}\text{C}$ -NMR spectra of FAHFAs

#### $^1\text{H}$ and $^{13}\text{C}$ -NMR of 12-OAHSA (2)

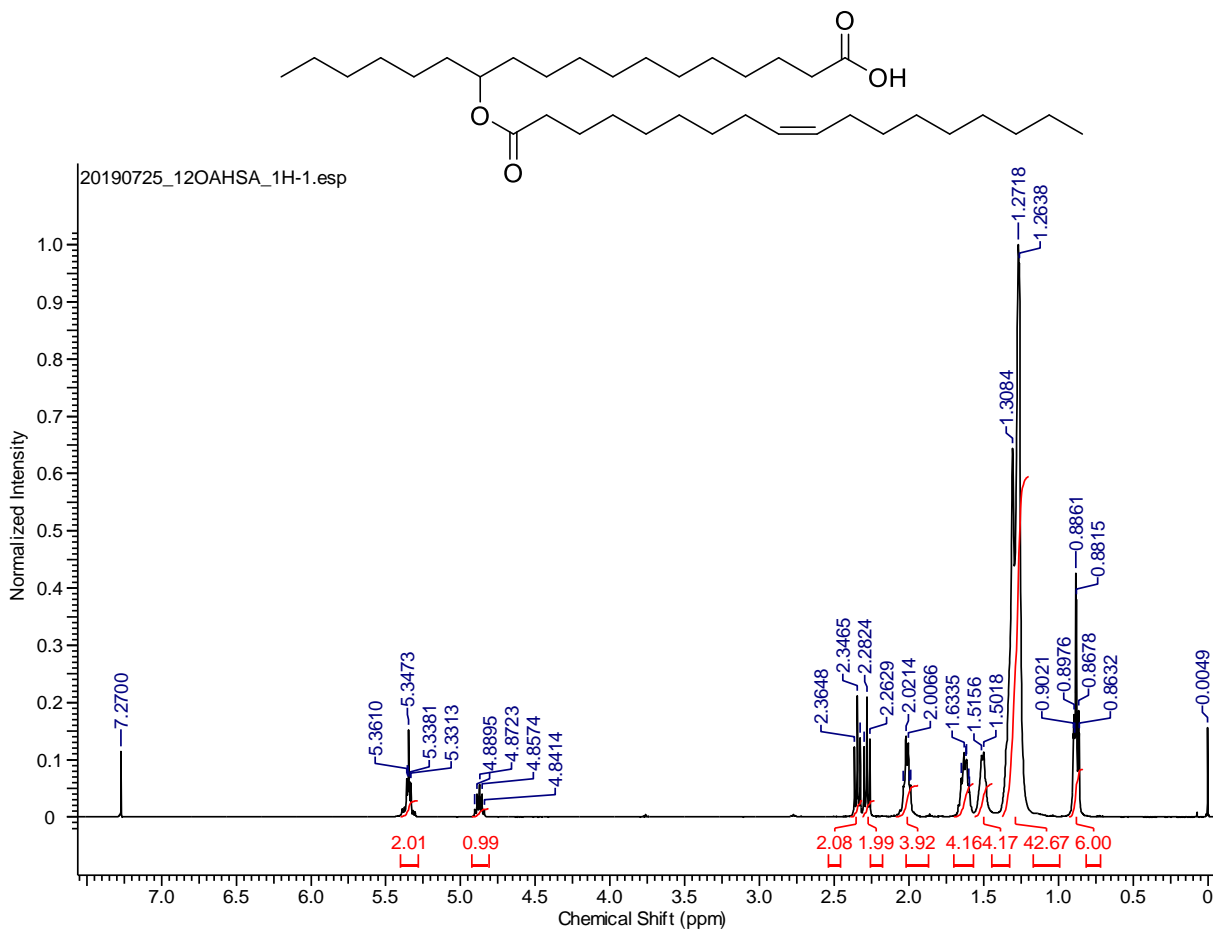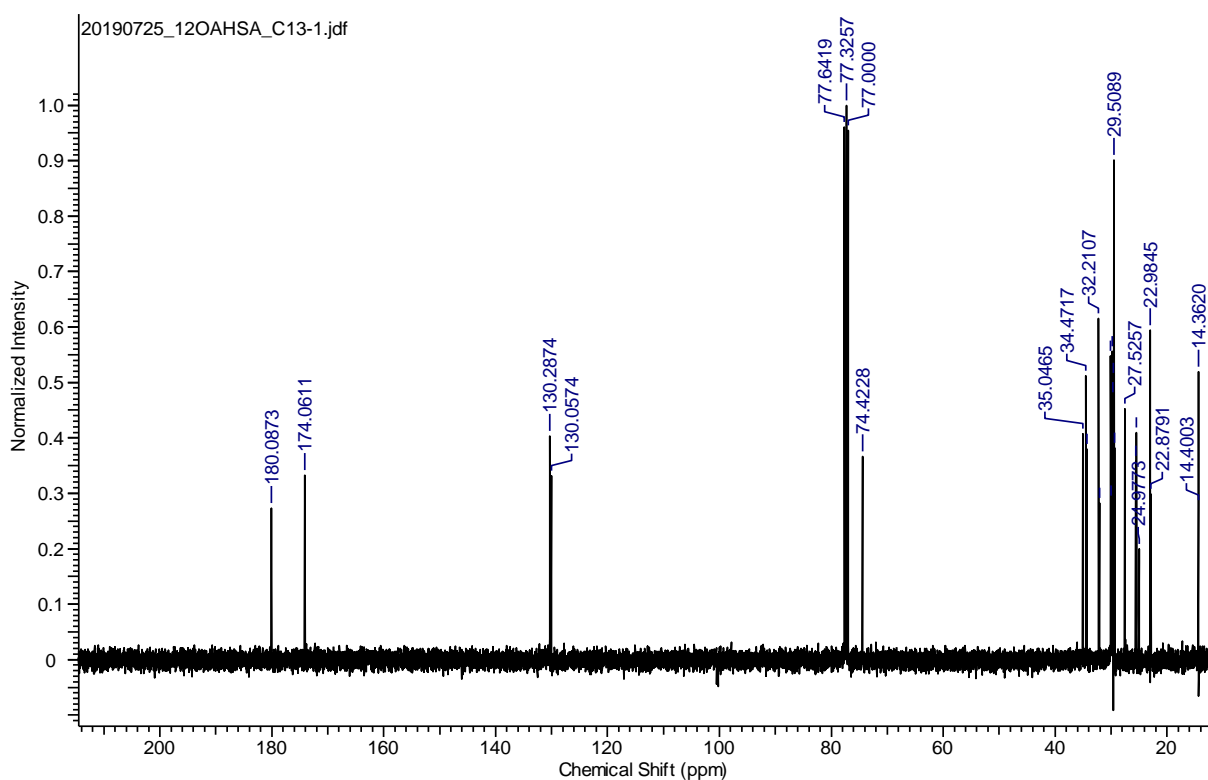

# $^1\text{H}$ and $^{13}\text{C}$ -NMR of 12-OAHOA (2a)

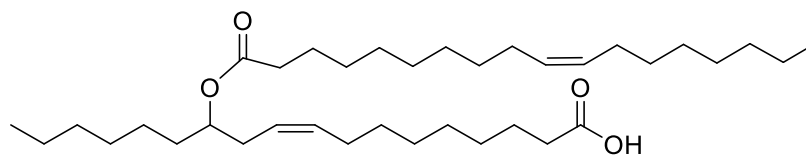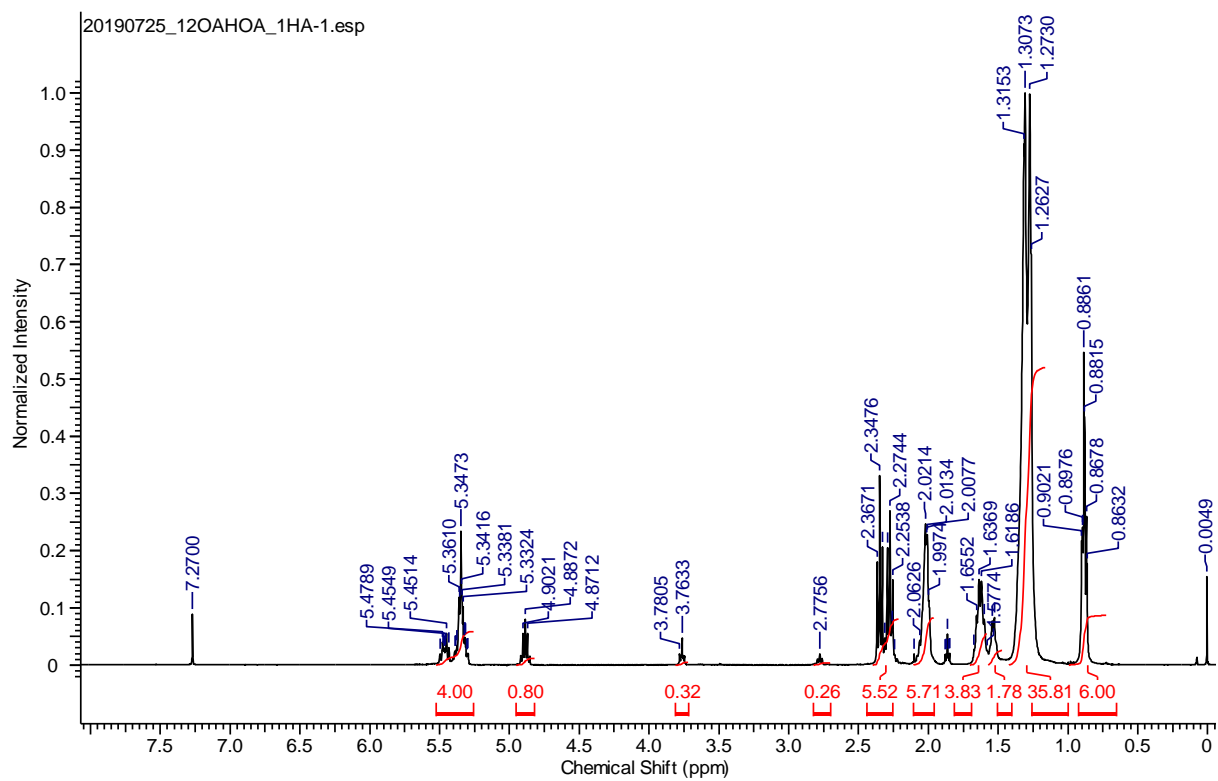

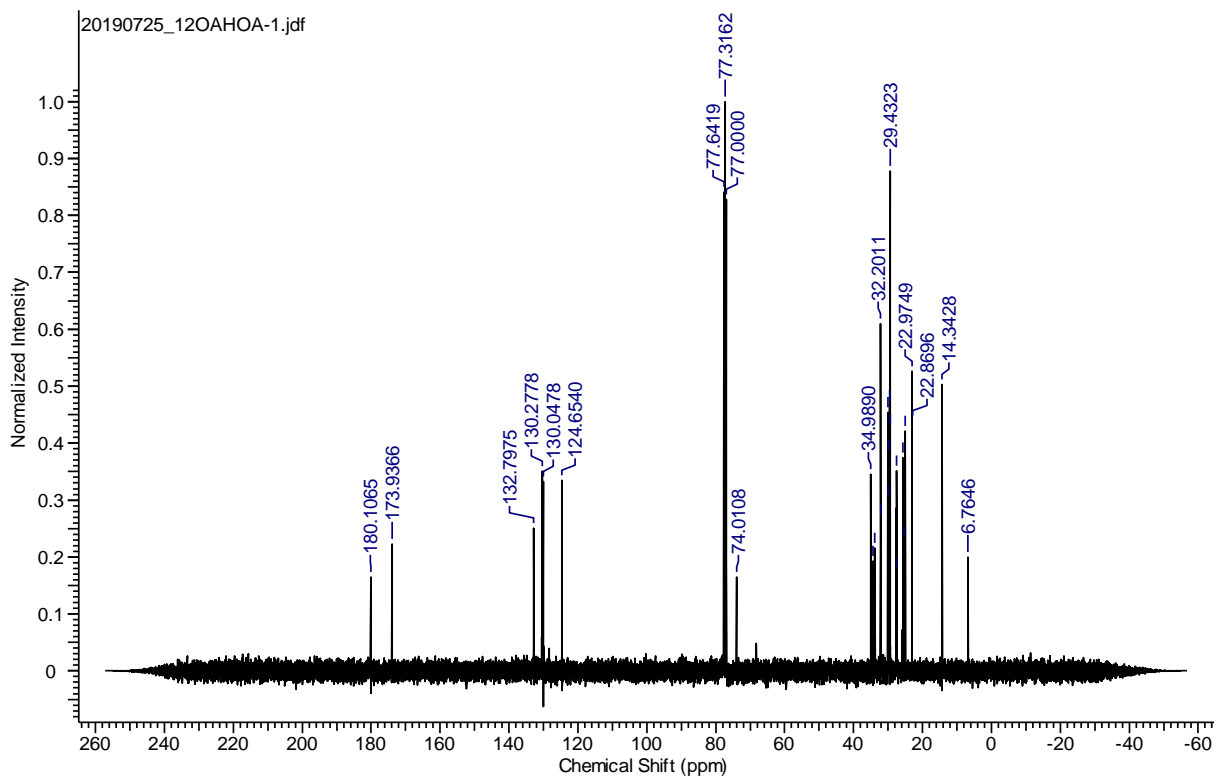

**$^1\text{H}$  and  $^{13}\text{C}$ -NMR of 12-LAHSA (3)**

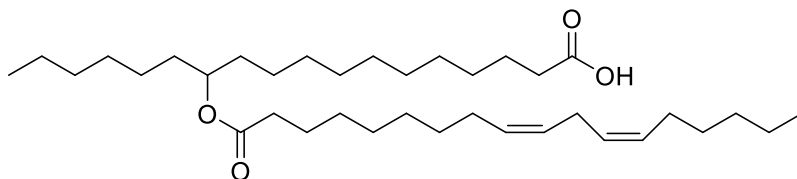

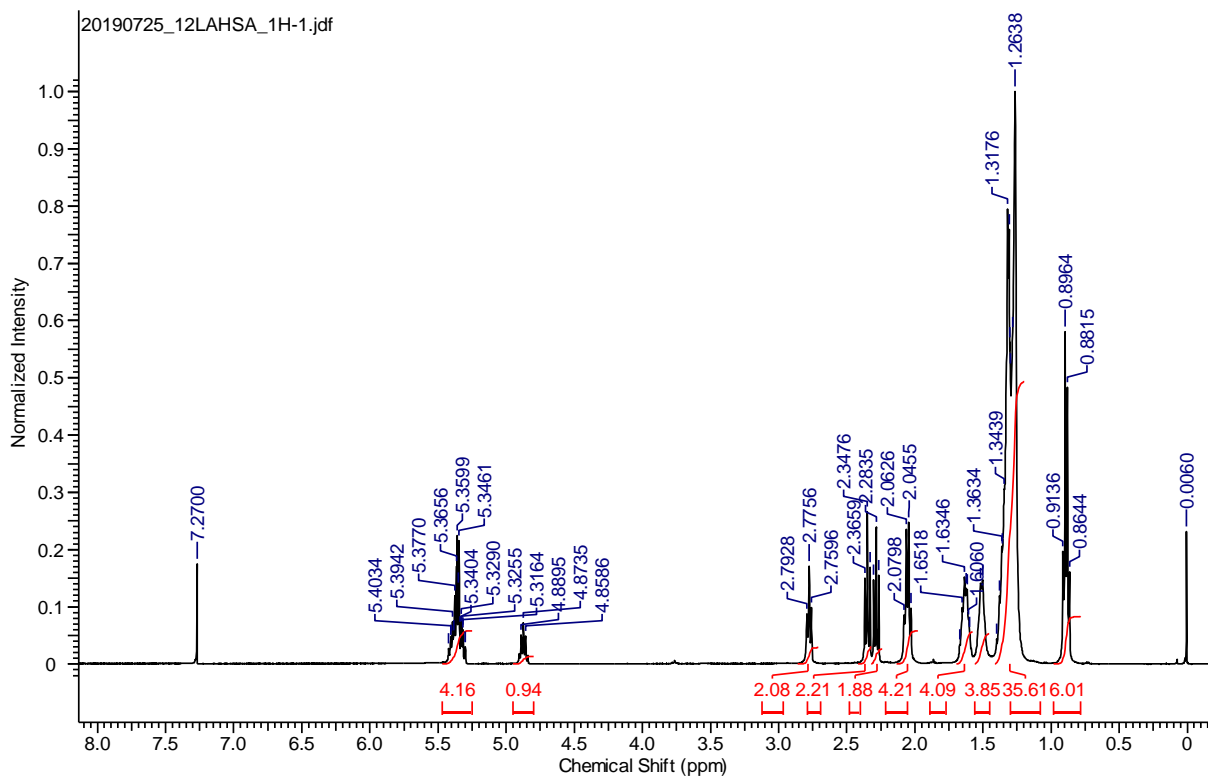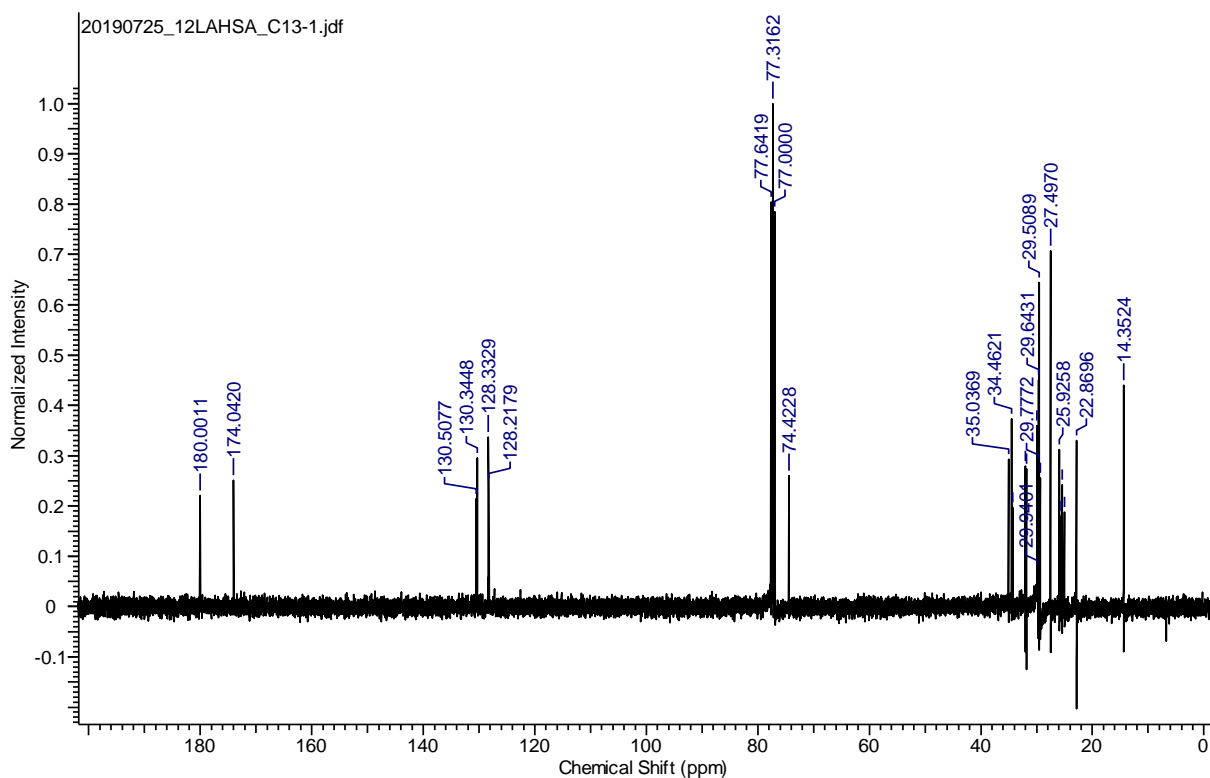

<sup>1</sup>H and <sup>13</sup>C-NMR of 12-LAHOA (3a)

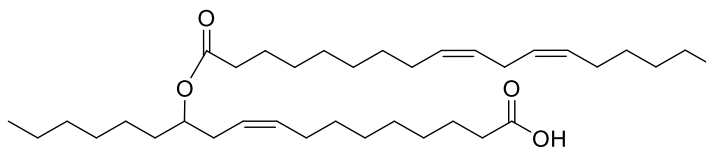

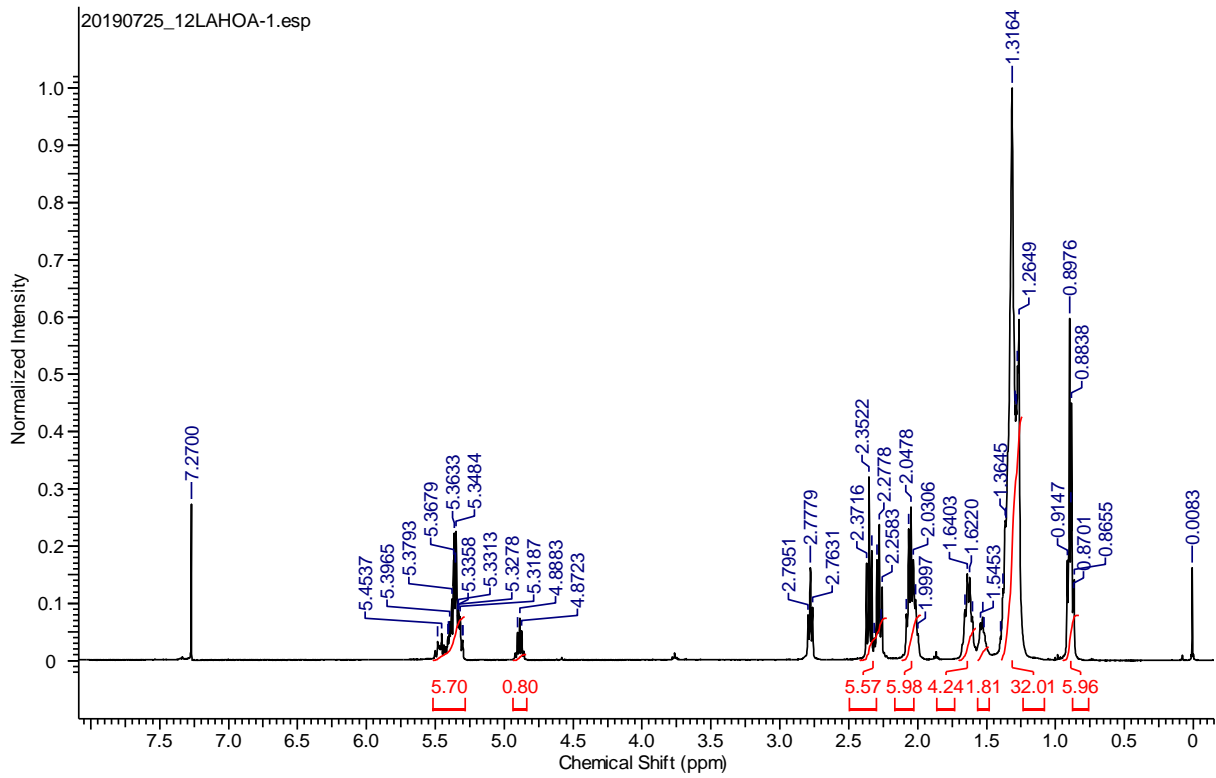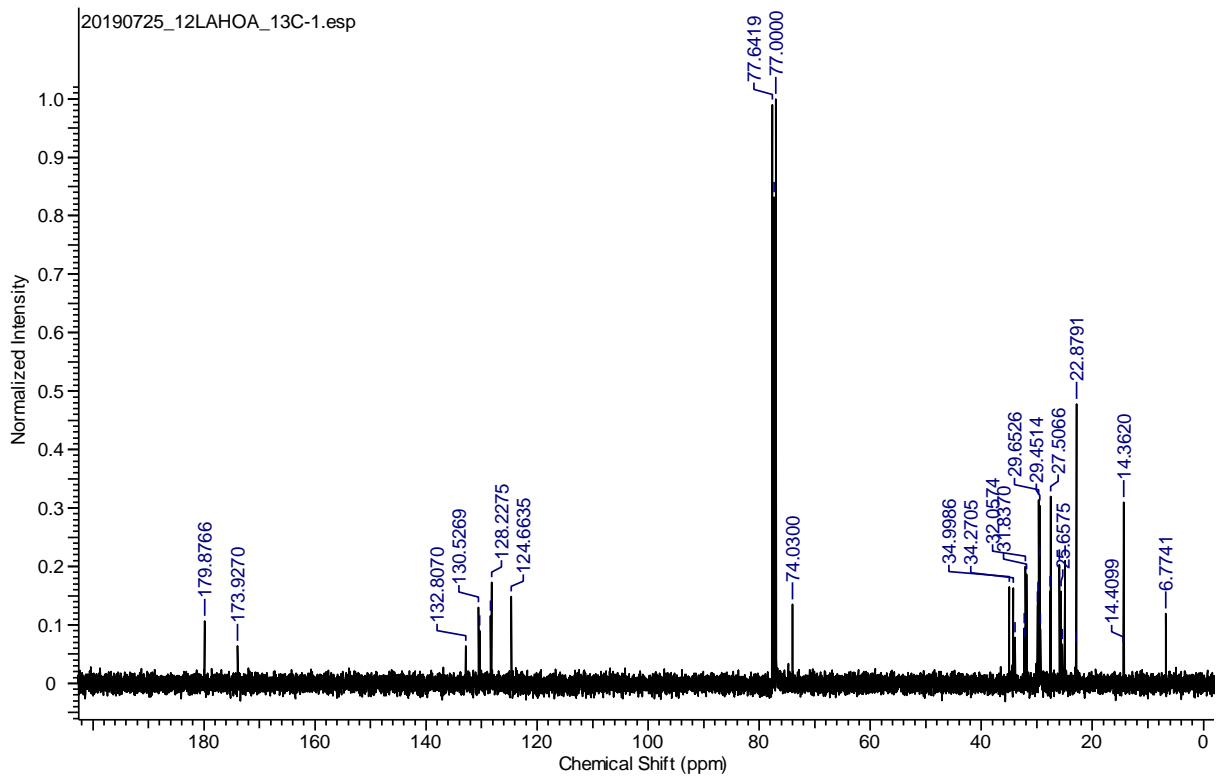

**<sup>1</sup>H and <sup>13</sup>C-NMR of 12-EPAHSA (4)**

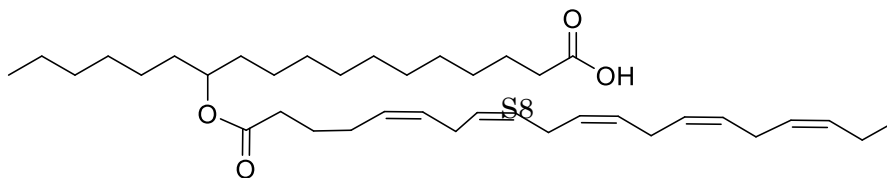



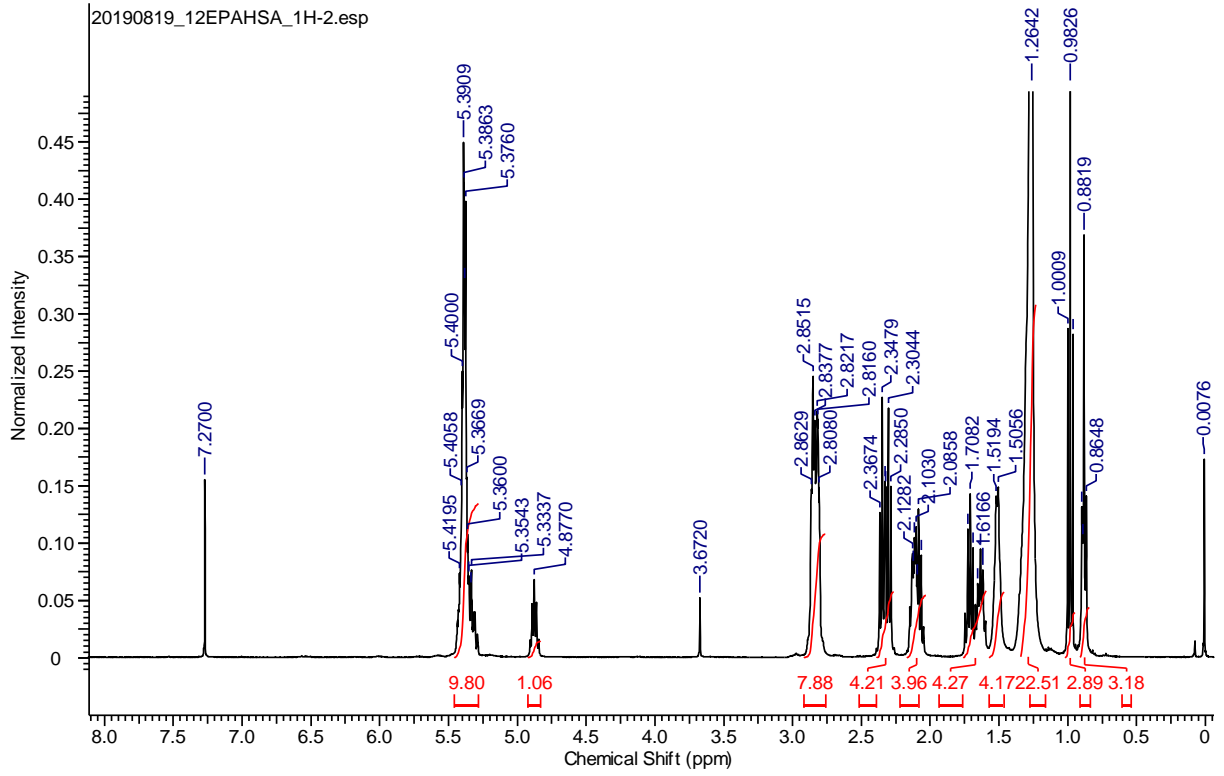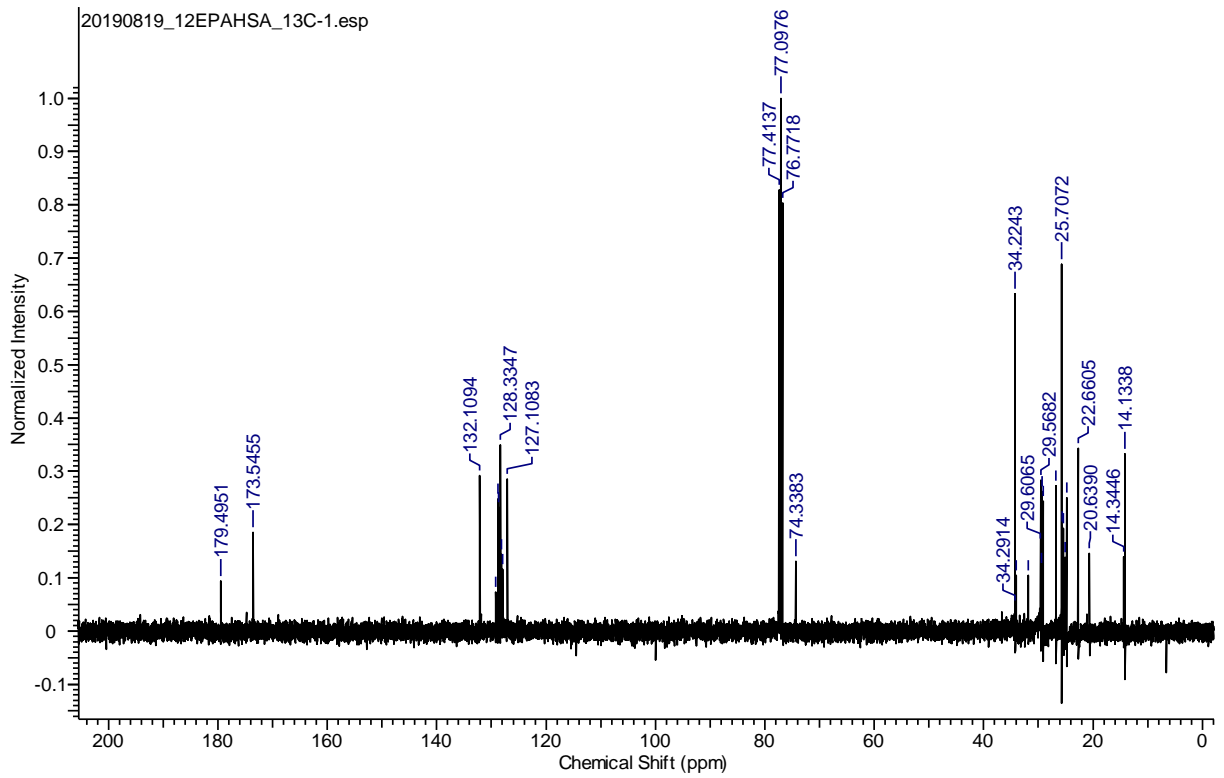

# <sup>1</sup>H and <sup>13</sup>C-NMR of 12-EPAHOA (4a)

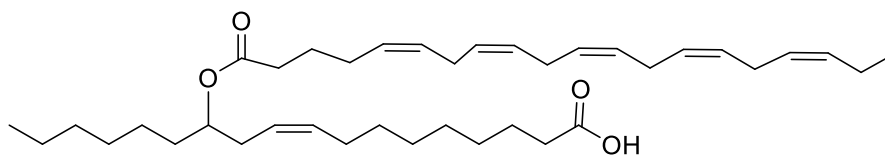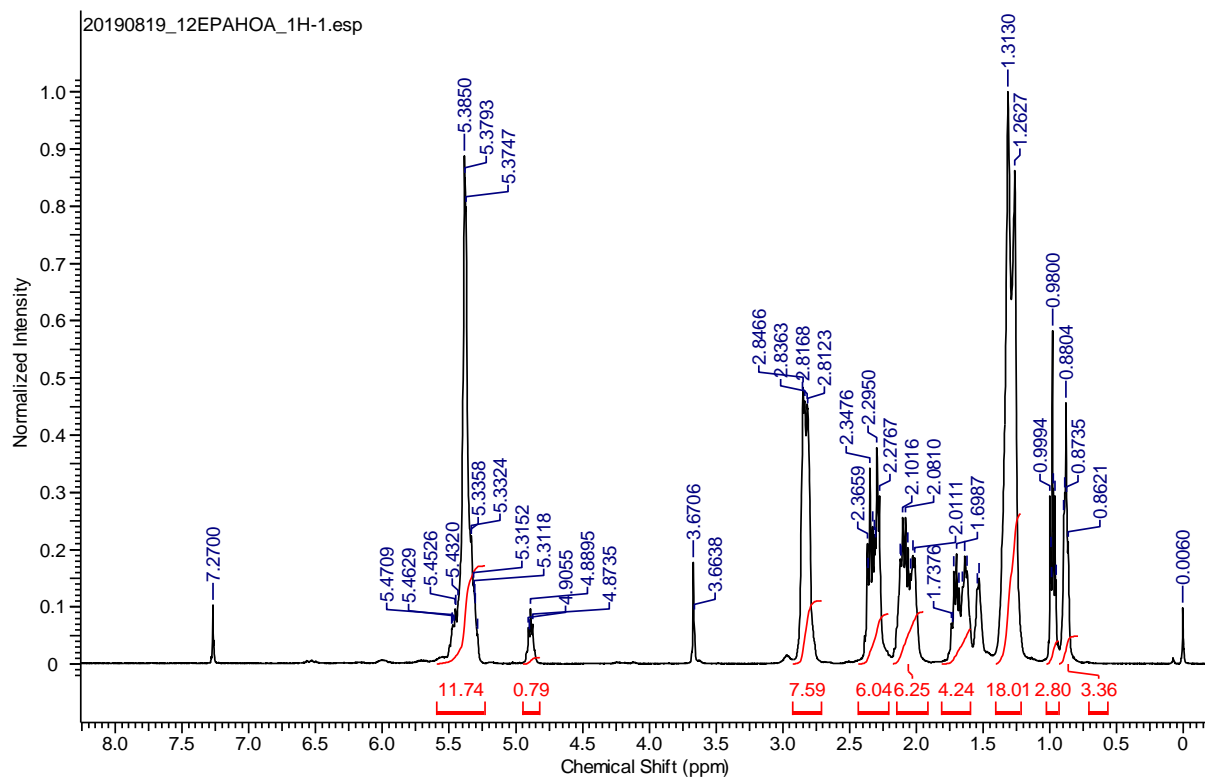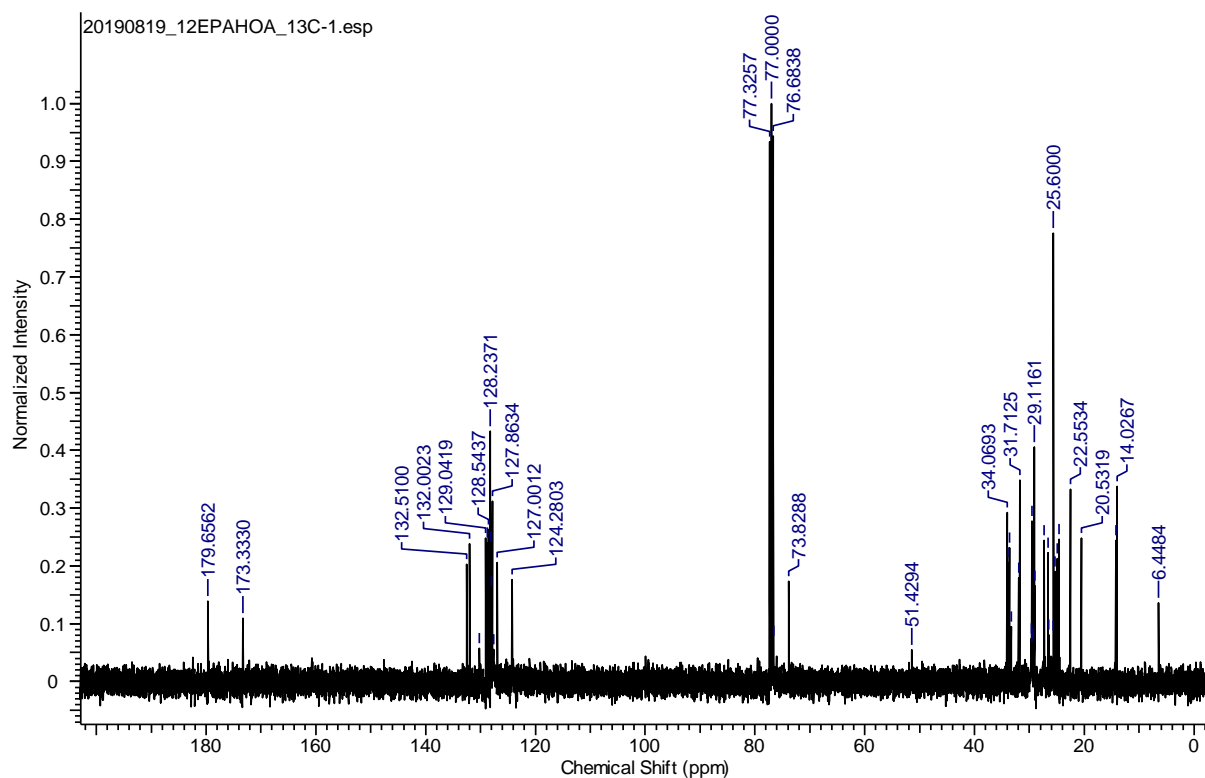

Supplement: antioxidants-09-00397-s001.pdf [file antioxidants-09-00397-s001.pdf]
